# Supplementary material for: Optical properties and composition of viscous organic particles found in the Southern Great Plains
Source: Copernicus journal article supplement (doi:10.5194/acp-20-11593-2020), 2020-10-12
Supplement: Supplementary file 1 [file acp-20-11593-2020-supplement.zip]

Archive with 128 entries (121 files):
- acp-20-11593-2020-supplement-title-page.pdf
- Supplemental/
- Supplemental/acp-2020-255_Supplemental.zip
- Supplemental/dftregistration.m
- Supplemental/ExtractVararginValue.m
- Supplemental/CalciumMaps.m
- Supplemental/sillystring.m
- Supplemental/ASOP HiScale SGP Supplementary_ReviewerResponse_ChangesAccepted.pdf
- Supplemental/extractingmfracGUI.m
- Supplemental/AlignStack.m
- Supplemental/FTMatrixShift.m
- Supplemental/SimpleStats.m
- Supplemental/MergingRawSTXMData.m
- Supplemental/RemoveHorizStreaks_STXM.m
- Supplemental/LoadStackRawMulti.m
- Supplemental/ParticleSize.m
- Supplemental/SulfurMaps.m
- Supplemental/export_fig/
- Supplemental/export_fig/user_string.m
- Supplemental/export_fig/ghostscript.m
- Supplemental/export_fig/append_pdfs.m
- Supplemental/export_fig/im2gif.m
- Supplemental/export_fig/crop_borders.m
- Supplemental/export_fig/pdf2eps.m
- Supplemental/export_fig/LICENSE
- Supplemental/export_fig/isolate_axes.m
- Supplemental/export_fig/using_hg2.m
- Supplemental/export_fig/pdftops.m
- Supplemental/export_fig/desktop.ini
- Supplemental/export_fig/fix_lines.m
- Supplemental/export_fig/ImageSelection.class
- Supplemental/export_fig/print2eps.m
- Supplemental/export_fig/copyfig.m
- Supplemental/export_fig/read_write_entire_textfile.m
- Supplemental/export_fig/export_fig.m
- Supplemental/export_fig/README.md
- Supplemental/export_fig/print2array.m
- Supplemental/export_fig/ImageSelection.java
- Supplemental/export_fig/eps2pdf.m
- Supplemental/TotalSphericity.m
- Supplemental/MixingStatesforGUI.m
- Supplemental/PreToPostRatioVolFrac.m
- Supplemental/LoadImageRawMixingStateforGUI.m
- Supplemental/multihdrsplit.m
- Supplemental/CarbonMapsSuppFigs.m
- Supplemental/NitrogenMaps.m
- Supplemental/desktop.ini
- Supplemental/tight_subplot.m
- Supplemental/uipickfiles.m
- Supplemental/PotassiumMaps.m
- Supplemental/CNOeleMaps.m
- Supplemental/STACKLab.m
- Supplemental/OdStackGUI.m
- Supplemental/OxygenMaps.m
- Supplemental/energytest.m
- Supplemental/STACKLab.fig
- Supplemental/removeoutlier_IQRtest.m
- Supplemental/MixingState.m
- Supplemental/makinbinmap.m
- Supplemental/stxmsort.m
- Supplemental/TestingBeersLaw.m
- Supplemental/STXM_GUIv2.m
- Supplemental/ReadHdrMulti.m
- Supplemental/SingStackProcMixingStateOutputNOFIGS.m
- Supplemental/DirLabelOrgVolFrac.m
- Supplemental/FindingTotGradAngle.m
- Supplemental/OdStack.m
- Supplemental/HISCALE Specific/
- Supplemental/HISCALE Specific/Rain Stuff/
- Supplemental/HISCALE Specific/Rain Stuff/ImportingVDisRain.m
- Supplemental/HISCALE Specific/Rain Stuff/OpticalRainGuage_Import.m
- Supplemental/HISCALE Specific/Rain Stuff/Plotting_RainVSAAE.m
- Supplemental/HISCALE Specific/Rain Stuff/VideoDisdromeder_Import.m
- Supplemental/HISCALE Specific/Rain Stuff/desktop.ini
- Supplemental/HISCALE Specific/Rain Stuff/ImportingORGRain.m
- Supplemental/HISCALE Specific/plotting_multiperipheral.m
- Supplemental/HISCALE Specific/hiscale_sizeVcarbonabs.m
- Supplemental/HISCALE Specific/CroppingSmokePng.m
- Supplemental/HISCALE Specific/hiscale_writeprecipgif.m
- Supplemental/HISCALE Specific/hiscale_importRI.m
- Supplemental/HISCALE Specific/hiscale_plotting_sizevcabs.m
- Supplemental/HISCALE Specific/uvvis_plot.m
- Supplemental/HISCALE Specific/CollectingSampleDates.m
- Supplemental/HISCALE Specific/AsopVAAEplot.m
- Supplemental/HISCALE Specific/PSAP and Absorbance/
- Supplemental/HISCALE Specific/PSAP and Absorbance/Calculating_Rain_AAE.m
- Supplemental/HISCALE Specific/PSAP and Absorbance/AAE_QualityControl.m
- Supplemental/HISCALE Specific/PSAP and Absorbance/PSAP_triple_stacked_plot_time_series.m
- Supplemental/HISCALE Specific/PSAP and Absorbance/desktop.ini
- Supplemental/HISCALE Specific/PSAP and Absorbance/Averaging_AAE_afterRain.m
- Supplemental/HISCALE Specific/PSAP and Absorbance/hiscale_addrainpatch.m
- Supplemental/HISCALE Specific/PSAP and Absorbance/PSAPabsorbance_Azores.m
- Supplemental/HISCALE Specific/PSAP and Absorbance/PSAPmatthewedit.m
- Supplemental/HISCALE Specific/PSAP and Absorbance/hiscale_miecalc.m
- Supplemental/HISCALE Specific/hiscale_PeakRatios.m
- Supplemental/HISCALE Specific/desktop.ini
- Supplemental/HISCALE Specific/hiscale_importUVVIS.m
- Supplemental/HISCALE Specific/hiscale_averagingAerosolConc.m
- Supplemental/HISCALE Specific/hiscale_import_tarthief.m
- Supplemental/HISCALE Specific/STXM Spectra/
- Supplemental/HISCALE Specific/STXM Spectra/PlottingSpectra_hiscale_ASOPs.m
- Supplemental/HISCALE Specific/STXM Spectra/hiscaleLabASOPs.m
- Supplemental/HISCALE Specific/STXM Spectra/BackgroundFit_STXM.m
- Supplemental/HISCALE Specific/STXM Spectra/desktop.ini
- Supplemental/HISCALE Specific/STXM Spectra/PlottingSpectra_STXM.m
- Supplemental/HISCALE Specific/STXM Spectra/NormalizeSpectra.m
- Supplemental/HISCALE Specific/hiscale_import_asopthief.m
- Supplemental/HISCALE Specific/Plotting_RefractiveIndex.m
- Supplemental/HISCALE Specific/ARM Data Scripts/
- Supplemental/HISCALE Specific/ARM Data Scripts/hiscale_importO3.m
- Supplemental/HISCALE Specific/ARM Data Scripts/hiscale_importCO.m
- Supplemental/HISCALE Specific/ARM Data Scripts/hiscale_importSMPS.m
- Supplemental/HISCALE Specific/ARM Data Scripts/hiscale_APSimport.m
- Supplemental/HISCALE Specific/ARM Data Scripts/CPC_Import.m
- Supplemental/HISCALE Specific/ARM Data Scripts/hiscale_importCLAP.m
- Supplemental/HISCALE Specific/ARM Data Scripts/hiscale_qc_so2_o3[Conflict].m
- Supplemental/HISCALE Specific/ARM Data Scripts/hiscale_importSO2.m
- Supplemental/HISCALE Specific/ARM Data Scripts/hiscale_qc_psap2nd.m
- Supplemental/HISCALE Specific/ARM Data Scripts/desktop.ini
- Supplemental/HISCALE Specific/ARM Data Scripts/hiscale_importACSM.m
- Supplemental/HISCALE Specific/ARM Data Scripts/hiscale_importMFRSR.m
- Supplemental/HISCALE Specific/ARM Data Scripts/hiscale_qc_clap.m
- Supplemental/HISCALE Specific/ARM Data Scripts/hiscale_qc_so2_o3[Conflict 1].m
- Supplemental/HISCALE Specific/ARM Data Scripts/hiscale_qc_smps.m
- Supplemental/HISCALE Specific/ARM Data Scripts/hiscale_qc_so2_o3.m
- Supplemental/HISCALE Specific/hiscale_sizedistsamples.m
- Supplemental/HISCALE Specific/ComplexIndexRefraction.m
- Supplemental/BeamtimeSummaryPlots.m
