# Supplementary material for: Optical properties and composition of viscous organic particles found in the Southern Great Plains
Source: Copernicus journal article supplement (doi:10.5194/acp-20-11593-2020), 2020-10-12
Supplement: Supplementary file 1 [file acp-20-11593-2020-supplement.zip › acp-20-11593-2020-supplement-title-page.pdf]

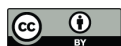

## *Supplement of*

# **Optical properties and composition of viscous organic particles found in the Southern Great Plains**

**Matthew Fraund et al.**

*Correspondence to:* Matthew Fraund (m\_fraund@u.pacific.edu)

- acp-20-11593-2020-supplement-title-page.pdf
- Supplemental
  - ASOP HiScale SGP Supplementary\_ReviewerResponse\_ChangesAccepted.pdf
  - AlignStack.m
  - BeamtimeSummaryPlots.m
  - CNOeleMaps.m
  - CalciumMaps.m
  - CarbonMapsSuppFigs.m
  - DirLabelOrgVolFrac.m
  - ExtractVararginValue.m
  - FTMatrixShift.m
  - FindingTotGradAngle.m
  - HISCALE Specific
    - \* ARM Data Scripts
    - \* AsopVAAEplot.m
    - \* CollectingSampleDates.m
    - \* ComplexIndexRefraction.m
    - \* CroppingSmokePng.m
    - \* PSAP and Absorbance
    - \* Plotting\_RefractiveIndex.m
    - \* Rain Stuff
    - \* STXM Spectra
    - \* desktop.ini
    - \* hiscale\_PeakRatios.m
    - \* hiscale\_averagingAerosolConc.m
    - \* hiscale\_importRI.m

- \* hiscale\_importUVVIS.m
- \* hiscale\_import\_asopthief.m
- \* hiscale\_import\_tarthief.m
- \* hiscale\_plotting\_sizevcabs.m
- \* hiscale\_sizeVcarbonabs.m
- \* hiscale\_sizedistsamples.m
- \* hiscale\_writeprecipgif.m
- \* plotting\_multiperipheral.m
- \* uvvis\_plot.m
- LoadImageRawMixingStateforGUI.m
- LoadStackRawMulti.m
- MergingRawSTXMData.m
- MixingState.m
- MixingStatesforGUI.m
- NitrogenMaps.m
- OdStack.m
- OdStackGUI.m
- OxygenMaps.m
- ParticleSize.m
- PotassiumMaps.m
- PreToPostRatioVolFrac.m
- ReadHdrMulti.m
- RemoveHorizStreaks\_STXM.m
- STACKLab.fig
- STACKLab.m
- STXM\_GUIv2.m
- SimpleStats.m
- SingStackProcMixingStateOutputNOFIGS.m
- SulfurMaps.m
- TestingBeersLaw.m
- TotalSphericity.m
- acp-2020-255\_Supplemental.zip
- desktop.ini
- dftregistration.m
- energytest.m
- export\_fig
  - \* ImageSelection.class
  - \* ImageSelection.java
  - \* LICENSE
  - \* README.md
  - \* append\_pdfs.m
  - \* copyfig.m
  - \* crop\_borders.m
  - \* desktop.ini

- \* eps2pdf.m
- \* export\_fig.m
- \* fix\_lines.m
- \* ghostscript.m
- \* im2gif.m
- \* isolate\_axes.m
- \* pdf2eps.m
- \* pdftops.m
- \* print2array.m
- \* print2eps.m
- \* read\_write\_entire\_textfile.m
- \* user\_string.m
- \* using\_hg2.m
- extractingmfracGUI.m
- makinbinmap.m
- multihdrsplot.m
- removeoutlier\_IQRtest.m
- sillystring.m
- stxmsort.m
- tight\_subplot.m
- uipickfiles.m

The copyright of individual parts of the supplement might differ from the CC BY 4.0 License.
