# Supplementary material for: Optical properties and composition of viscous organic particles found in the Southern Great Plains
Source: Copernicus journal article supplement (doi:10.5194/acp-20-11593-2020), 2020-10-12
Supplement: Supplementary file 1 [file acp-20-11593-2020-supplement.zip › Supplemental/AlignStack.m]

% FTAlignStack
%slightly modified by Matthew Fraund

function S=AlignStack(stack)

% 081010 Tobias Henn

S=stack;
stackcontainer=stack.spectr;

clear S.spectr

[ymax,xmax,emax]=size(stackcontainer);

xresolution=S.Xvalue/xmax;
yresolution=S.Yvalue/ymax;

center=ceil(emax/4*3);

spectr=zeros(ymax,xmax,emax);

shifts=zeros(emax,4);

%calculate image shifts for each energy,perform shift with FT method

for k=1:emax                      
    
    shifts(k,:)=dftregistration(fft2(stackcontainer(:,:,center)),fft2(stackcontainer(:,:,k)),50);
    spectr(:,:,k)=FTMatrixShift(stackcontainer(:,:,k),-shifts(k,3),-shifts(k,4));
    
end

%Reduce image size

shiftymax=ceil(max(shifts(:,3)));
shiftxmax=ceil(max(shifts(:,4)));
shiftymin=ceil(abs(min(shifts(:,3))));
shiftxmin=ceil(abs(min(shifts(:,4))));

shiftmatrix=zeros(ymax-shiftymin-shiftymax,xmax-shiftxmax-shiftxmin,emax);

shiftmatrix(:,:,:)=spectr((1+shiftymax):(ymax-shiftymin),(1+shiftxmax):(xmax-shiftxmin),:);

S.spectr=abs(shiftmatrix);

S.Xvalue=size(S.spectr,2)*xresolution;
S.Yvalue=size(S.spectr,1)*yresolution;

if isempty(S.spectr)
    errmsg = sprintf('%s',S.particle,' produces an error with AlignStack, \n unaligned structure returned instead\n');
    if any(exist('cprintf','file'))
        cprintf('UnterminatedStrings',errmsg);
    else
        disp(errmsg);
    end
    S = stack;
end

return
