# Supplementary material for: Optical properties and composition of viscous organic particles found in the Southern Great Plains
Source: Copernicus journal article supplement (doi:10.5194/acp-20-11593-2020), 2020-10-12
Supplement: Supplementary file 1 [file acp-20-11593-2020-supplement.zip › Supplemental/CalciumMaps.m]

function Snew = CalciumMaps(Snew)


energy = Snew.eVenergy;

[~,capreidx] = min(abs(energy - 347));
[~,capostidx] = min(abs(energy - 352.5));

capreval = energy(capreidx);
capostval = energy(capostidx);


if capreval > 340 && capreval < 349
else
    disp('missing Ca pre-edge energy');
end

if capostval > 350 && capostval < 355
else
    disp('Missing Ca post-edge energy');
end

totCa = Snew.spectr(:,:,capostidx) - Snew.spectr(:,:,capreidx);

totCa(totCa < 0) = 0;

totCa = totCa .* Snew.binmap;

Snew.totCa = totCa;


end
