# Supplementary material for: Optical properties and composition of viscous organic particles found in the Southern Great Plains
Source: Copernicus journal article supplement (doi:10.5194/acp-20-11593-2020), 2020-10-12
Supplement: Supplementary file 1 [file acp-20-11593-2020-supplement.zip › Supplemental/CarbonMapsSuppFigs.m]

function Snew=CarbonMapsSuppFigs(Snew,varargin)
% Snew=CarbonMaps(Snew,sp2,savepath,sample{j})
% Snew=CarbonMaps(Snew,35)
% Input
%   Snew is the stack structure produced using functions OdStack.m and
%   AlignStack.m or any bastardization of those
% Output__________________________________________________________________
% Snew.TotC is the post edge minus the pre edge image
% Snew.sp2 is the sp2 map
% Snew.SootEccentricity, MajorAxisLength, MinorAxisLength are vectors with
%   the parameters of best fit elipse around soot inclusion
% Snew.ConvexArea is a vector of areas convex hull around soot inclusion
% Snew.SootArea is a vector of areas for each soot inclusion
% Snew.LabelMat is a matrix with particle numbers at each pixel of
%   corresponding particle. Particle numbering goes from left to right (see 
%   MATLAB documentation on bwlabel.m) 
% Snew.PartLabel is a cell array of strings containing particle
%   classification labels for each particle: OC, OCIN, OCBC, OCBCIN...
% Snew.PartSN is a matrix of particle serial numbers having the format
%  YY-MM-DD-StackNumber-ParticleNumber
% Snew.BinMap matrix containing zeros where there are no particles and ones
%   where particles have been identified
% Snew.Size is a vector of area equivalent diameters for each particle
% Snew.CompSize is a matrix of sizes for different componets OC BC etc 
%   (columns) for all particles (rows)
% Snew.PartDirs is a cell array of directories where data file is found
%   (these should all be the same).
% Snew.RGBCompMap RGB matrices for different components (BC=red=RGBCompMap(:,:,1)
%   ,OC=green=RGBCompMap(:,:,2),Inorganic Dominant=blue=RGBCompMap(:,:,3))
% Snew.Maps(:,:,1) is a carbon map
% Snew.Maps(:,:,2) is a pre/post ratio map
% Snew.Maps(:,:,3) is a sp2 carbon map
% Snew.BinCompMap is a cell array of binary component maps
%                 ={carb,prepost,sp2}
% Snew.CompSize=[OCArea,InArea,ECArea,TotalParticleArea]
% RCM, UOP, 2013; update RCM 7/6/2016

energy=Snew.eVenergy;
stack=Snew.spectr;
subdim=ceil(sqrt(length(energy)));

% if nargin < 2
%     manualbinmapcheck = 'no';
%     varargin = {};
% elseif nargin < 3
%     manualbinmapcheck = 'no';
% end


if length(Snew.eVenergy)<2
    beep
    disp('too few images for this mapping routine');
    return
end
test=energy(energy<319 & energy>277);
if isempty(test)
    beep
    disp('this is not the carbon edge')
    return
end

if isempty(varargin)
    spThresh=0.35;
    figsav=0;
    nofig=0;
    manualbinmapcheck = 'no';
elseif length(varargin)==1
    spThresh=varargin{1};
    figsav=0;
    nofig=0;
    manualbinmapcheck = 'no';
elseif length(varargin)==2
    spThresh=varargin{1};
    rootdir=varargin{2};
    figsav=0;
    nofig=1;
    manualbinmapcheck = 'no';
elseif length(varargin)==3
    spThresh=varargin{1};
    rootdir=varargin{2};
    sample=varargin{3};
    figsav=1;
    nofig=0;
    manualbinmapcheck = 'no';
elseif length(varargin)==4
    spThresh=varargin{1};
    rootdir=varargin{2};
    sample=varargin{3};
    manualbinmapcheck = varargin{4};
    figsav=1;
    nofig=0;
elseif length(varargin)==5
    spThresh=varargin{1};
    rootdir=varargin{2};
    sample=varargin{3};
    manualbinmapcheck = varargin{4};
    figsav=1;
    nofig=0;
    binmap=varargin{5};
end

SNlimit = 0;

if spThresh>1
    %disp('sp2 threshold input as percent, dividing by 100 for diffmaps');
    spThresh=spThresh/100;
end

energy=Snew.eVenergy;
stack=Snew.spectr;
subdim=ceil(sqrt(length(energy)));

%% Finding relevant energy indicies
[~,sp2idx] = min(abs(energy - 285.4));
[~,preidx] = min(abs(energy - 278));
[~,carboxidx] = min(abs(energy - 288.6));
[~,postidx] = min(abs(energy - 320));

sp2val = energy(sp2idx);
preval = energy(preidx);
carboxval = energy(carboxidx);
postval = energy(postidx);

if sp2val < 284.5 || sp2val > 285.6
	disp('missing sp2 energy');
end

if preval <277 || preval > 283
	disp('missing pre-edge energy');
end

if carboxval < 288 || carboxval > 289
	disp('missing carbox energy');
end

if postval <320 || postval > 325
	disp('missing post-edge energy');
end

pre = stack(:,:,preidx);
sp2im = stack(:,:,sp2idx);
carboxim = stack(:,:,carboxidx);
post = stack(:,:,postidx);

pre = FindingTotGradAngle(pre);
sp2im = FindingTotGradAngle(sp2im);
carboxim = FindingTotGradAngle(carboxim);
post = FindingTotGradAngle(post);

pre(pre<0) = 0;
sp2im(sp2im<0) = 0;
carboxim(carboxim<0) = 0;
post(post<0) = 0;


% %%% Find particles
% meanim = sum(Snew.spectr,3); 
% 
% if isempty(carboxidx)
%     meanim=Snew.spectr(:,:,postidx);
% else  %I don't know what this else segment does?  if carboxidx is empty, this else will never be run
%     meanim=Snew.spectr(:,:,carboxidx);
% end
% 
% meanim(meanim>0.2)=0.2;
% meanim(meanim<0) = 0;

if strcmp(manualbinmapcheck,'yes');
    rawbinmap = ~Snew.mask;
    templabelmat = bwlabel(rawbinmap,8);
    
    meanfig = figure;
    imagesc(mean(Snew.spectr,3));
    movegui(meanfig,'west');
    
    binfig = figure;
    imagesc(rawbinmap);
    colormap('gray');
    movegui(binfig,'east');
    
    title('Pick Particles to Remove, Right Click on Last Point');
    [xlist, ylist] = getpts(binfig);
    
    close(binfig);
    close(meanfig);
    
    for i = 1:length(xlist)
        currpartlabel = templabelmat(round(ylist(i)),round(xlist(i)));
        templabelmat(templabelmat == currpartlabel) = 0;
    end
    
    binmap = templabelmat;
    binmap(templabelmat > 0) = 1;
    
    binmap = bwareaopen(binmap,20);
elseif strcmp(manualbinmapcheck,'given')
    %%%if this portion is run, it means binmap was already assigned in the
    %%%varargin segment
else
    binmap = ~Snew.mask;
    binmap = imclearborder(binmap);
    binmap = bwareaopen(binmap,20);
end

%Define Label Matrix
LabelMat=bwlabel(binmap,8);

%%% Filter noise that appears as Small Particles
for i=1:max(max(LabelMat))
    [a1,b1]=find(LabelMat==i);
    linidx1=sub2ind(size(LabelMat),a1,b1);
    if length(linidx1)<7
        LabelMat(linidx1)=0;
    end
end
LabelMat(LabelMat>0)=1;
LabelMat=bwlabel(LabelMat);

%%% Assign Particle Serial Numbers and directories
% NumPart=max(max(LabelMat));
% PartZero=str2double(strcat(Snew.particle(5:end),'0000'));
% PartSN=[1:NumPart]+PartZero;
% dirstr=pwd;
% PartDir=strcat(dirstr);
% PartDirs=cell(NumPart,2);
% PartDirs(:,1)={PartDir};
% SearchString=strcat('*F',Snew.particle,'*.mat');
% FName=dir(SearchString);
% PartDirs(:,2)={FName(1).name};


%% %%%%%%%%%%%%%%%%%%%%%%%%%  Carbon Map %%%%%%%%%%%%%%%%%%%%%%%%%%%%%%%%%%%
carb=post-pre;
errcarb = sqrt(Snew.errOD(:,:,postidx).^2 + Snew.errOD(:,:,preidx).^2);

carb1=carb;                  % taking STD of regions not having particles
noise = carb1(Snew.mask==1);
thresh = std(noise).*0; %trying this with LOQ (10xS/N) instead of LOD (3xS/N)
carb1(carb1<thresh) = 0;
% carb1(carb1<0)=0; % removes regions having negative total carbon

carb1=carb1.*binmap;
carb1 = imgaussfilt(carb1);
Snew.TotC=carb1;
carbmask=carb1;
carbmask(carbmask>0)=1;
carbmask = bwareaopen(carbmask,3);
carbmask=medfilt2(carbmask);

%% %%%%%%%%%%%%%%%%%%%%%%%%   Inorganic Map %%%%%%%%%%%%%%%%%%%%%%%%%%%%%%%
% pre=stack(:,:,preidx);
% Noise=std(pre(Snew.mask==1));
% pre(pre<0) = 0; %no negative optical densitites
% pre(pre<3.*Noise) = 0;

% post = stack(:,:,postidx);
% Noise_post = std(post(Snew.mask==1));
% post(post<0) = 0; %no negative optical densities
% post(post<3.*Noise_post) = 0;

prepost = pre./post;
errprepost = sqrt((Snew.errOD(:,:,preidx)./post).^2 + ((pre.* Snew.errOD(:,:,postidx)./post.^2)).^2); %calculus based (derivative) error propagation formula applied here
prepost(isinf(prepost)==1) = 0;
prepost(isnan(prepost)==1) = 0;

noise_pre = std(pre(Snew.mask==1));
premask = pre;
premask(pre < 10.*noise_pre) = 0;
premask = medfilt2(premask,[3,3]);
premask(premask>0) = 1;


prepost = medfilt2(prepost,[3,3]);
prepost = removeoutlier_IQRtest(prepost);

% Determining Noise Level
noise_prepost = std(prepost(Snew.mask == 1));

prepost = prepost .* binmap;

prepost(prepost < 4.*noise_prepost) = 0;

%%%Thresholding inorganics vs organics according to Moffet 2010.  0.5 is
%%%the value for KCl and works in general.  NaCl threshold would be ~1
%%%instead and NH4SO4 is 0.85
inorgthresh = 0.5;
Snew.inorgthresh = inorgthresh;
prepost(prepost<inorgthresh)=0;

prepostmask=prepost;
prepostmask = medfilt2(prepost,[3,3]);
prepostmask(prepost>0)=1;
prepostmask = bwareaopen(prepostmask,11); %removing small particles
prepostmask = prepostmask .* premask;
%% %%%%%%%%%%%%%%%%%%%%%%%% SP2 Map %%%%%%%%%%%%%%%%%%%%%%%%%%%%%%%%%%% 
% HOPG(285.25)=0.8656; HOPG(310)=0.4512;
if ~isempty(sp2idx)
    %sp2img = stack(:,:,sp2idx);
    doublecarb=sp2im-pre; % make sp2 map by subtracting preedge
    errdoublecarb = sqrt(Snew.errOD(:,:,sp2idx).^2 + Snew.errOD(:,:,preidx).^2);   
    doubCarbNois=std(doublecarb(Snew.mask==1)); % calculate the noise of the sp2 peak by
    
    doublecarb1=doublecarb;
    doublecarb1(doublecarb1<10*doubCarbNois)=0; % removes regions with sp2 less than 3x S/N
    spmask=doublecarb1.*binmap;
    spmask(spmask>0)=1;                  % make binary sp2 mask
    
    doublecarb2=(doublecarb1./carb) .* (0.4512/0.8656) .*spmask;
    sp2NoThresh=doublecarb2;
    sp2NoThresh(sp2NoThresh<0)=NaN;
    sp2NoThresh(sp2NoThresh>1)=1;
    Snew.sp2=sp2NoThresh;
   
	rawsp2 =(doublecarb1./carb)  .*  (0.4512/0.8656);
	rawsp2(isinf(rawsp2)==1) = 0;
    rawsp2(isnan(rawsp2)==1) = 0;
    sp2=(doublecarb1./carb)  .*  (0.4512/0.8656).*spmask; % calculate %sp2 of masked images
    errsp2 = (0.4512./0.8656).*sqrt((errdoublecarb./carb).^2 + ((doublecarb.*errcarb./carb.^2).^2));
    sp2(isinf(sp2)==1) = 0;
    sp2(isnan(sp2)==1) = 0;
       
    
%     upperq3 = prctile(sp2(sp2~=0),75);
%     lowerq2 = prctile(sp2(sp2~=0),25);
%     iqr = upperq3 - lowerq2;
%     sp2(sp2>upperq3+1.5.*iqr) = 0;fig
%     sp2(sp2<lowerq2-1.5.*iqr) = 0;
%     outlierflag = 1;
%     while outlierflag == 1;
%         maxflag = 0;
%         minflag = 0;
%         upperq3 = prctile(sp2(sp2~=0),75);
%         lowerq2 = prctile(sp2(sp2~=0),25);
%         iqr = upperq3 - lowerq2;
%         testoutlier_max = max(max(sp2));
%         testoutlier_min = min(min(sp2(sp2~=0)));
%         if testoutlier_max > upperq3 + iqr.*1.5
%             sp2(sp2==testoutlier_max) = 0;
%             maxflag = 1;
%         end
%         
%         if testoutlier_min < lowerq2 - iqr.*1.5
%             sp2(sp2==testoutlier_min) = 0;
%             minflag = 1;
%         end
%         
%         if maxflag == 0 && minflag == 0
%             outlierflag = 0;
%         end
%     
%     end
    
	sp2(sp2 < 0) = 0;
    sp2 = removeoutlier_IQRtest(sp2); %removing very large numbers
    
    sp2noise = std(rawsp2(Snew.mask==1));
    sp2 = sp2 .* binmap;
    sp2(sp2 < 3.*sp2noise) = 0; %should be < SNLimit
    sp2(sp2<spThresh)=0;                                                     % threshold everythin less than 40% sp2
    
    finSp2mask=sp2;
    finSp2mask = medfilt2(finSp2mask);
    finSp2mask = bwareaopen(finSp2mask,8);
    finSp2mask(finSp2mask>0)=1;
    
    % figure,imagesc(finSp2mask),colormap gray
    
    % get rid of small few pixel regions
    finSp2mask=bwlabel(finSp2mask,8);

    for i=1:max(max(finSp2mask))
        [a1,b1]=find(finSp2mask==i);
        linidx1=sub2ind(size(finSp2mask),a1,b1);
        if length(linidx1)<7
            finSp2mask(linidx1)=0;
        end
    end
    finSp2mask(finSp2mask>0)=1;
    bw=im2bw(finSp2mask);
    % figure,imagesc(bw),colormap gray
    %ImStruct=regionprops(bw,'Eccentricity','MajorAxisLength','MinorAxisLength','ConvexHull');
    ImStruct=regionprops(bw,'Eccentricity','MajorAxisLength','MinorAxisLength','ConvexArea','Area');
    Ecc = reshape([ImStruct.Eccentricity],size(ImStruct));
    Maj=reshape([ImStruct.MajorAxisLength],size(ImStruct));
    Min=reshape([ImStruct.MinorAxisLength],size(ImStruct));
    %ImStruct.ConvexArea
    %ImStruct.Area
    Cvex=reshape([ImStruct.ConvexArea],size(ImStruct));
    Area=reshape([ImStruct.Area],size(ImStruct));
    Snew.SootEccentricity=Ecc;
    Snew.SootMajorAxisLength=Maj;
    Snew.SootMinorAxisLength=Min;
    Snew.SootConvexArea=Cvex;
    Snew.SootArea=Area;
else
    sp2=zeros(size(binmap));
    finSp2mask=zeros(size(binmap));
    doublecarb=zeros(size(binmap));
end

% figure,imagesc(finSp2mask),colormap gray

%% Combine maps, 
BinCompMap{1}=carbmask;
BinCompMap{2}=prepostmask;
BinCompMap{3}=finSp2mask;
%%% This first loop creates masks for the individual components over the
%%% entire field of view. Each component is then defined as a colored
%%% component for visualization.
ColorVec=[...
	0,170,0;...
	0,255,255;...
	255,0,0;...
	255,170,0;...
	255,255,255]; %%% rgb colors of the different components

MatSiz=size(LabelMat);
RgbMat=zeros([MatSiz,3]);
RedMat=zeros(MatSiz);
GreMat=zeros(MatSiz);
BluMat=zeros(MatSiz);

[l,m]=find(LabelMat>0);
labidx=sub2ind(MatSiz,l,m);
cnt=1;
for i=1:length(BinCompMap)%i=[1,2,3] %% loop over chemical components
    [j,k]=find(BinCompMap{cnt}>0); %% find index of >0 components
    if ~isempty(j) || ~isempty(k)  %% this conditional defines a color for the component areas (if it exists)
        linidx=sub2ind(size(BinCompMap{cnt}),j,k); %% change to linear index
        rejidx=setdiff(linidx,labidx); %% find componets that overlap with particles
        BinCompMap{cnt}(rejidx)=0; %% set regions that dont overlap to zero
        linidx=sub2ind(size(BinCompMap{cnt}),find(BinCompMap{cnt}>0)); %% get linear index of regions having nonzero values
        RedMat(linidx)=ColorVec(cnt,1); %% define the color for the ith component
        GreMat(linidx)=ColorVec(cnt,2);
        BluMat(linidx)=ColorVec(cnt,3);
        trmat=zeros(size(RedMat));
        tgmat=zeros(size(RedMat));
        tbmat=zeros(size(RedMat));
        trmat(linidx)=ColorVec(cnt,1);
        tgmat(linidx)=ColorVec(cnt,2);
        tbmat(linidx)=ColorVec(cnt,3);
        ccmap{cnt}(:,:,1)=trmat;
        ccmap{cnt}(:,:,2)=tgmat;
        ccmap{cnt}(:,:,3)=tbmat;
        clear trmat tgmat tbmat
    else
        ccmap{cnt}=zeros(MatSiz(1),MatSiz(2),3);
    end
    cnt=cnt+1;  %% this counter keeps track of the indivdual components.
    clear j k linidx GrayImage Thresh Mask rejidx;
end
clear l m
%%% This second loop assigns labels over individual particles defined
%%% previously in Diffmaps.m
NumPart=max(max(LabelMat));
% LabelStr={'OC','In','K','EC'};
LabelStr={'OC','In','EC'};

CompSize=zeros(NumPart,length(LabelStr)+1);
PartLabel={};
for i=1:NumPart  %% Loop over particles defined in Diffmaps.m
    PartLabel{i}='';
    for j=1:length(LabelStr)  %% Loop over chemical components
        [a1,b1]=find(LabelMat==i);  %% get particle i
        [a2,b2]=find(BinCompMap{j}>0); %% get component j
        if ~isempty([a1,b1]) && ~isempty([a2,b2])
            linidx1=sub2ind(size(LabelMat),a1,b1); %% Linear index for particle
            linidx2=sub2ind(size(BinCompMap{j}),a2,b2); %% Linear index for component
            IdxCom=intersect(linidx1,linidx2); %% find common indices
            if length(IdxCom)>3%0.05*length(linidx1) %% if component makes up greater than 2% of the pixels of the particle...
                    PartLabel{i}=strcat(PartLabel{i},LabelStr{j}); %% give label of component.
                    CompSize(i,j)=length(IdxCom); %% number of pixels in the component.
            end
        end
    end
    if isempty(PartLabel{i})
        PartLabel{i}='NoID'; %% Particles identified by Otsu's mehod here but not in Particle map script
    end
    CompSize(i,j+1)=length(linidx1);  %% number of pixels in the particle
    clear linidx1 linidx2 IdxCom a1 b1 a2 b2;
end
if isempty(PartLabel)
    PartLabel='NoID';
else
    PartLabel=PartLabel;
end

%%%Define outputs
Snew.LabelMat=LabelMat;
Snew.PartLabel=PartLabel;
% Snew.PartSN = PartSN';
binmap=zeros(size(LabelMat));
binmap(LabelMat>0)=1;
Snew.binmap=binmap;
Snew=ParticleSize(Snew);
XSiz=Snew.Xvalue/MatSiz(1);
YSiz=Snew.Yvalue/MatSiz(2);
CompSize=CompSize.*(XSiz*YSiz); %% Area of components in um^2
Snew.CompSize=CompSize;
% Snew.PartDirs=PartDirs;
   
RgbMat(:,:,1)=RedMat;
RgbMat(:,:,2)=GreMat;
RgbMat(:,:,3)=BluMat;
Snew.RGBCompMap=RgbMat;
for i=1:length(BinCompMap)
    temp{i}=BinCompMap{i};
    temp{i}(temp{i}>1)=1;
end
xdat=[0:XSiz:Snew.Xvalue];
ydat=[0:YSiz:Snew.Yvalue];

%%% Combined Masks
% % % % % if nofig==0
% % % % %    subplot(2,2,4),
% % % % %     image(xdat,ydat,uint8(RgbMat))
% % % % %     title(sprintf('Red=sp2>%g%,Blue=pre/post>0.5,green=Organic',spThresh));
% % % % %     axis image
% % % % %     xlabel('X (\mum)');
% % % % %     ylabel('Y (\mum)');
% % % % %     if figsav==1
% % % % %         filename=sprintf('%s%s%s%s',rootdir,sample,Snew.particle,'_Maps');
% % % % %         saveas(gcf,filename,'png');
% % % % %     end
% % % % % end
xysiz=size(carb);
Snew.Maps=zeros(xysiz(1),xysiz(2),3);
Snew.Maps(:,:,1)=carb;
Snew.errcarb = errcarb;
Snew.Maps(:,:,2)=prepost;
Snew.errprepost = errprepost;
Snew.Maps(:,:,3)=sp2;
Snew.errsp2 = errsp2;
% if figsav==1
% filename=sprintf('%s%s%s%s',rootdir,sample,particle,'_f2_thresh');
% saveas(gcf,filename,'png');
% end
Snew.BinCompMap=temp;
% Snew=MultPartAvSpec(Snew);
% if figsav==1
% filename=sprintf('%s%s%s%s',rootdir,sample,particle,'_f3_spec');
% saveas(gcf,filename,'png');
% close all
% end
