# Supplementary material for: Optical properties and composition of viscous organic particles found in the Southern Great Plains
Source: Copernicus journal article supplement (doi:10.5194/acp-20-11593-2020), 2020-10-12
Supplement: Supplementary file 1 [file acp-20-11593-2020-supplement.zip › Supplemental/energytest.m]

function Snew = energytest(structORvec)

if isstruct(structORvec)
	Snew = structORvec;
	energy = Snew.eVenergy;
elseif isvector(structORvec)
	energy = structORvec;
end


Snew.elements.S = 0;
Snew.elements.C = 0;
Snew.elements.K = 0;
Snew.elements.Ca = 0;
Snew.elements.N = 0;
Snew.elements.O = 0;

spreflag = 0;   spostflag = 0;
cpreflag = 0;   cpostflag = 0;
kpreflag = 0;   kpostflag = 0;
capreflag = 0;  capostflag = 0;
npreflag = 0;   npostflag = 0;
opreflag = 0;   opostflag = 0;

%%%%
%% Testing for Sulfur
%%%%
[~,spreidx] = min(abs(energy - 160));
[~,spostidx] = min(abs(energy - 190));
spreval = energy(spreidx);
spostval = energy(spostidx);
if spreval > 150 && spreval < 170
	spreflag = 1;
end

if spostval > 180 && spostval < 200
	spostflag = 1;
end

if spreflag == 1 && spostflag == 1
    Snew.elements.S = 1;
end


%%%%
%% Testing for Carbon
%%%%
[~,cpreidx] = min(abs(energy - 278));
[~,cpostidx] = min(abs(energy - 320));
cpreval = energy(cpreidx);
cpostval = energy(cpostidx);
if cpreval > 277 && cpreval < 283
	cpreflag = 1;
end

if cpostval > 290 && cpostval < 325
	cpostflag = 1;
end

if cpreflag == 1 && cpostflag == 1
    Snew.elements.C = 1;
end

%%%%
%% Testing for Potassium  %must add peak positions.  This is not a simple
%%%% pre/post quantification!!!
%%%%
[~,kpreidx] = min(abs(energy - 294.5));
[~,kpostidx] = min(abs(energy - 303.5));
kpreval = energy(kpreidx);
kpostval = energy(kpostidx);
if kpreval > 293.5 && kpreval < 295.5
	kpreflag = 1;
end

if kpostval > 301.5 && kpostval < 305.5
	kpostflag = 1;
end

if kpreflag == 1 && kpostflag == 1
    Snew.elements.K = 1;
end


%%%%
%% Testing for Calcium
%%%%
[~,capreidx] = min(abs(energy - 347));
[~,capostidx] = min(abs(energy - 352.5));
capreval = energy(capreidx);
capostval = energy(capostidx);
if capreval > 340 && capreval < 350
	capreflag = 1;
end

if capostval > 350 && capostval < 355
	capostflag = 1;
end

if capreflag == 1 && capostflag == 1
    Snew.elements.Ca = 1;
end


%%%%
%% Testing for Nitrogen
%%%%
[~,npreidx] = min(abs(energy - 400));
[~,npostidx] = min(abs(energy - 430));
npreval = energy(npreidx);
npostval = energy(npostidx);
if npreval > 380 && npreval < 410
	npreflag = 1;
end

if npostval > 420 && npostval < 450
	npostflag = 1;
end

if npreflag == 1 && npostflag == 1
    Snew.elements.N = 1;
end


%%%%
%% Testing for Oxygen
%%%%
[~,opreidx] = min(abs(energy - 525));
[~,opostidx] = min(abs(energy - 550));
opreval = energy(opreidx);
opostval = energy(opostidx);
if opreval > 510 && opreval < 535
	opreflag = 1;
end

if opostval > 540 && opostval < 560
	opostflag = 1;
end

if opreflag == 1 && opostflag == 1
    Snew.elements.O = 1;
end


end
