# Supplementary material for: Optical properties and composition of viscous organic particles found in the Southern Great Plains
Source: Copernicus journal article supplement (doi:10.5194/acp-20-11593-2020), 2020-10-12
Supplement: Supplementary file 1 [file acp-20-11593-2020-supplement.zip › Supplemental/ExtractVararginValue.m]

function [remainingargs, value] = ExtractVararginValue(args, name, default)
remainingargs = {};
skipping = false;
value = default;
for i = 1:length(args)
    if strcmp(args{i}, name)
        value = args{i+1};
        skipping = true;
    elseif skipping
        skipping = false;
    else
        remainingargs{end+1} = args{i};
    end
end
