# Supplementary material for: Optical properties and composition of viscous organic particles found in the Southern Great Plains
Source: Copernicus journal article supplement (doi:10.5194/acp-20-11593-2020), 2020-10-12
Supplement: Supplementary file 1 [file acp-20-11593-2020-supplement.zip › Supplemental/HISCALE Specific/AsopVAAEplot.m]

aae = [0.808;1.196;1.419;1.419;1.226;1.226;1.148;2.012;2.012;1.290;1.290];
asop = [5;3;23;25;12;15;13;70;60;10;35];
mdl = fitlm(asop,aae);

figure;

plot(asop,aae,'LineStyle','none','Marker','.','MarkerSize',20);
