# Supplementary material for: Optical properties and composition of viscous organic particles found in the Southern Great Plains
Source: Copernicus journal article supplement (doi:10.5194/acp-20-11593-2020), 2020-10-12
Supplement: Supplementary file 1 [file acp-20-11593-2020-supplement.zip › Supplemental/HISCALE Specific/CollectingSampleDates.m]

% 4/26/16      14:00:00-15:30:00
% 4/27/16      7:55:00-17:00:00
% 4/27/16     22:00:00-4:45:00
% 4/28/16      9:45:00-14:50:00
% 4/28/16      18:30:00-4:30:00
% 4/30/16       11:30:00-18:30:00 
% 5/1/16       11:30:00-15:30:00 
% 5/2/16       9:00:00-17:15:00 
% 5/2/16      20:00:00-6:00:00 
% 5/5/16           8:00:00-21:00:00 
% 5/6/16         12:00:00-16:45:00 
% 5/7/16         11:00:00-15:40:00
% 5/10/16         12:00:00-16:45:00
% 5/12/16         9:00:00-14:45:00
% 5/13/16         11:00:00-14:45:00
% 5/14/16         11:00:00-15:45:00
% 5/15/16         12:00:00-16:45:00
% 5/17/16         11:00:00-15:45:00
