# Supplementary material for: Optical properties and composition of viscous organic particles found in the Southern Great Plains
Source: Copernicus journal article supplement (doi:10.5194/acp-20-11593-2020), 2020-10-12
Supplement: Supplementary file 1 [file acp-20-11593-2020-supplement.zip › Supplemental/HISCALE Specific/plotting_multiperipheral.m]

[cotime,co] = hiscale_importCO();

[conctime,conc] = CPC_Import();

[vdistime,precip] = ImportingVDisRain();
