# Supplementary material for: Optical properties and composition of viscous organic particles found in the Southern Great Plains
Source: Copernicus journal article supplement (doi:10.5194/acp-20-11593-2020), 2020-10-12
Supplement: Supplementary file 1 [file acp-20-11593-2020-supplement.zip › Supplemental/LoadStackRawMulti.m]

function S = LoadStackRawMulti(filedir)
%function S = LoadStackRawMulti(filedir)
%
%Imports STXM raw data from input directoy filedir
%filedir needs to contain the STXM header file (.hdr) and the STXM data files (.xim)
%R.C. Moffet, T.R. Henn February 2009
%
%Modified by Matthew Fraund November 2015
%Updated by MWF 5/28/18 to work with maps or stacks
%
%Inputs
%------
%filedir        path to STXM raw data directory (folder)
%
%Outputs
%-------
%S              structure array containing imported STXM data
%S.spectr       STXM absorption images
%S.eVenergy     Photon energies used to record images
%S.Xvalue       length of horizontal STXM image axis in �m (window range)
%S.Yvalue       length of vertical STXM image axis in �m (window range)
%S.position     structure of positioning values
%   {xvalues,yvalues,xcenter,ycenter,xstep,ystep,xpts,ypts}
%   all values in um except x/ypts wich are in pixels
%

%% Going to Folder
cd(filedir) 
FileList = dir;
lsize = size(FileList,1); %length doesn't work here because the file name may be longer than the number of files

%% Finding Image and Header files
hdrcnt = 1;
ximcnt = 1;
for j = 1:lsize
    currentfile = FileList(j).name; %paring off spaces before and after file name
    hdrflag = strfind(currentfile,'.hdr'); %finding .hdr files
	ximflag = strfind(currentfile,'.xim'); %finding .xim files
	
	if ~isempty(hdrflag)
		hdridx(hdrcnt) = j;
		hdrcnt = hdrcnt + 1;
	elseif ~isempty(ximflag)
		ximidx(ximcnt) = j;
		ximcnt = ximcnt + 1;
	end
end

%% Loading Map (more than 1 header) or Stack (only 1 header)
if length(hdridx) > 1
	for q = 1:length(ximidx)
		[S.eVenergy(q),S.Xvalue,S.Yvalue,multiregion,S.position]=ReadHdrMulti(FileList(hdridx(q)).name);
		S.spectr(:,:,q) = flipud(load(FileList(ximidx(q)).name));
	end
	
else
	[S.eVenergy,S.Xvalue,S.Yvalue,multiregion,S.position]=ReadHdrMulti(FileList(hdridx).name); %running modified ReadHdr
	for q = 1:length(ximidx)
		S.spectr(:,:,q) = flipud(load(FileList(ximidx(q)).name));
	end
	
end

%% Check for Multi region image (we don't really do these)
if multiregion == 1 %display error message
    errormsg = sprintf('%s',filedir,' is a multistack dir, run stxmsort with multihdrsplit first');
    errordlg(errormsg);
end
        
%% truncate crashed stacks:
if size(S.spectr,3)<length(S.eVenergy)
    S.eVenergy((size(S.spectr,3)+1):length(S.eVenergy))=[];
end

end
