# Supplementary material for: Optical properties and composition of viscous organic particles found in the Southern Great Plains
Source: Copernicus journal article supplement (doi:10.5194/acp-20-11593-2020), 2020-10-12
Supplement: Supplementary file 1 [file acp-20-11593-2020-supplement.zip › Supplemental/TotalSphericity.m]

function  Sout = TotalSphericity(Snew)


Sout = Snew;


totalthicknessmap = Snew.ThickMap(:,:,1) + Snew.ThickMap(:,:,2);
currpartthicknessmap = zeros(size(totalthicknessmap));

for i = 1:max(max(Snew.LabelMat))
    
    currpartthicknessmap = totalthicknessmap(Snew.LabelMat == i);
    
    currpartthickness = max(max(currpartthicknessmap));
    
    ParticleSphericity(i) = (currpartthickness.*10^9)./(Snew.Size(i).*1000);
    poo=1;%boop
    
    
end


Sout.ParticleSphericity = ParticleSphericity;


SphericityMap = zeros(size(Snew.LabelMat));

for k = 1:max(max(Snew.LabelMat))
    SphericityMap(Snew.LabelMat == k) = Sout.ParticleSphericity(k);
end

asoptest = zeros(size(Snew.LabelMat));
asoptest(SphericityMap >= 0.8) = 1;
smallsphericityidx = SphericityMap > 0 & SphericityMap < 0.8;
asoptest(smallsphericityidx) = 0.1;

sphericityfig = figure;
set(sphericityfig,'Units','normalized','Position',[0.15,0.15,0.6,0.5]);
axh = tight_subplot(1,2,[0.01,0.02],[0.01,0.05],[0.01,0.01]);

axes(axh(1));
imagesc(SphericityMap,[0,1]);
% colorbar;
title('Particle Sphericity');

axes(axh(2));
% subplot(1,2,2)
imagesc(asoptest,[0,1]);
colorbar;
title('Yellow means > 0.8 sphericity');

for j = 1:2
   set(axh(j),'XTick',[],'YTick',[]);
end


end
